# Supplementary material
Source: PubMed Central journal article supplement (PMC5939901)
Supplement: cs8b00153_si_001.pdf [file cs8b00153_si_001.pdf]

# 1 Supporting Information

2

## 3 Chemoselective Hydrogenation of Aldehydes under Mild, Base-Free 4 Conditions – Manganese Outperforms Rhenium

5 Mathias Glatz,<sup>†</sup> Berthold Stöger,<sup>§</sup> Daniel Himmelbauer,<sup>†</sup> Luis F. Veiros,<sup>‡</sup> and Karl Kirchner<sup>\*,†</sup>

6

7 <sup>†</sup>Institute of Applied Synthetic Chemistry, <sup>§</sup>X-Ray Center, Vienna University of Technology,  
8 Getreidemarkt 9, A-1060 Vienna, AUSTRIA, and <sup>‡</sup>Centro de Química Estrutural, Instituto Superior  
9 Técnico, Universidade de Lisboa, Av. Rovisco Pais No. 1, 1049-001 Lisboa, PORTUGAL

10

11

12 **General experimental information** ..... S2

13 **General Procedure for the Hydrogenation Reactions** ..... S2

14 **Synthesis of *cis*-[Mn(PNP<sup>CH2</sup>-*i*Pr)(CO)<sub>2</sub>H] (Mn3)** ..... S2

15 **Synthesis of *cis*-[Re(PNP-*i*Pr)(CO)<sub>2</sub>Cl] (4)** ..... S3

16 **Synthesis of *cis*-[Re(PNP-*i*Pr)(CO)<sub>2</sub>H] (Re1)** ..... S3

17 **Synthesis of *cis*-[Re(PNP<sup>CH2</sup>-*i*Pr)(CO)<sub>2</sub>H] (Re2)** ..... S3

18 **Computational Details** ..... S4

19 **Crystal Structure Determination** ..... S5

20 **NMR spectra of all complexes** ..... S7-S14

21 **References** ..... S15

22

1 **General experimental information.** All manipulations were performed under an inert atmosphere of  
2 argon by using Schlenk techniques or in a MBraun inert-gas glovebox. Hydrogen (99.999% purity)  
3 was purchased from Messer Austria and used as received. The solvents were purified according to  
4 standard procedures.<sup>1</sup> The deuterated solvents were purchased from Aldrich and dried over 4 Å  
5 molecular sieves. All aldehyde substrates were obtained from commercial sources and purified by  
6 distillation prior to use. Complexes *cis*-[Mn(PNP-*i*Pr)(CO)<sub>2</sub>H] (**Mn1**),<sup>2</sup> *cis*-[Mn(PNP<sup>Me</sup>-*i*Pr)(CO)<sub>2</sub>H]  
7 (**Mn2**),<sup>2</sup> *cis*-[Mn(PNP<sup>CH<sub>2</sub></sup>-*i*Pr)(CO)<sub>2</sub>Br] (**3**)<sup>3</sup> and *cis*-[Re(PNP<sup>CH<sub>2</sub></sup>-*i*Pr)(CO)<sub>2</sub>Cl] (**5**)<sup>4</sup> were prepared  
8 according to the literature. <sup>1</sup>H, <sup>13</sup>C{<sup>1</sup>H}, <sup>19</sup>F{<sup>1</sup>H}, and <sup>31</sup>P{<sup>1</sup>H} NMR spectra were recorded on Bruker  
9 AVANCE-250, 400, and AVANCE-600 spectrometers. <sup>19</sup>F{<sup>1</sup>H} NMR spectra are referenced externally  
10 to trifluorotoluene (0.05%) (δ = 0 ppm). <sup>1</sup>H and <sup>13</sup>C{<sup>1</sup>H} NMR spectra were referenced internally to  
11 residual protio-solvent, and solvent resonances, respectively, and are reported relative to  
12 tetramethylsilane (δ = 0 ppm). <sup>31</sup>P{<sup>1</sup>H} NMR spectra are referenced externally to H<sub>3</sub>PO<sub>4</sub> (85%) (δ = 0).

13 **General procedure for the hydrogenation of aldehydes.** All hydrogenation reaction were carried  
14 out in a Carl Roth 100 mL stainless steel autoclave containing a 20mL screw cap vial equipped with a  
15 septum, a small stirring bar and a 10 inch needle (gauge 18) connecting the vial on the bottom with  
16 the head of the autoclave for injecting the reaction solution. The autoclave was evacuated, flushed 3  
17 times with argon gas before use. For a typical experiment, the reaction solution was prepared inside a  
18 glovebox by mixing the substrate (2.0 mmol), ethanol (3 mL), the catalyst (1 mL, 0.10 μM stock  
19 solution in EtOH). The catalyst stock solutions were freshly prepared and readily used. For a typical  
20 experiment, including addition of base, the substrate (2.0 mmol), ethanol (2 mL), the catalyst (1 mL,  
21 0.10 μM stock solution in EtOH) and the base (1 mL, 0.30 μM stock solution in EtOH) were mixed. The  
22 resulting solution was taken up in a syringe via a twelve-inch needle (gauge 22), removed from the  
23 glovebox and injected into the autoclave under a slight flow of argon. The autoclave was then purged  
24 three times with H<sub>2</sub> gas before the final pressure was adjusted to the specified value and the reaction  
25 was carried for the stated time. Afterwards, the hydrogen gas was released, the vial was taken out of  
26 the autoclave and the solution was filtered over aluminum oxide. The solvent was then slowly removed  
27 under reduced pressure. The residue was analyzed by <sup>1</sup>H NMR and yields were determined by  
28 integration of the spectra after addition of mesitylene (2.0 mmol) as internal standard or by <sup>19</sup>F NMR  
29 spectroscopy.

## 30 **Synthesis**

31 ***cis*-[Mn(PNP<sup>CH<sub>2</sub></sup>-*i*Pr)(CO)<sub>2</sub>H] (**Mn3**).** To a suspension of *cis*-[Mn(PNP<sup>CH<sub>2</sub></sup>-*i*Pr)(CO)<sub>2</sub>Br] (**3**) (212 mg,  
32 0.40 mmol) in toluene (15 mL), a 1 M THF-solution of Na[HBET<sub>3</sub>] (0.4 mL, 0.4 mmol) is added at 0°C.  
33 After gas evolution, the solution turns clear and is stirred for 1h. The insoluble solids are removed by  
34 filtration over celite. The solvent is then removed under reduced pressure and the colorless product  
35 was washed with cold *n*-pentane (20 mL). The pale solid is dried under reduced pressure to obtain an  
36 off-white powder. Yield: 160 mg (90 %). Anal. Calcd. for C<sub>21</sub>H<sub>36</sub>MnNO<sub>2</sub>P<sub>2</sub> (451.40). C, 55.88; H, 8.04;  
37 N, 3.10. Found: C, 55.90; H, 8.06; N, 3.10. <sup>1</sup>H NMR (250 MHz, δ, C<sub>6</sub>D<sub>6</sub>, 20 °C) 6.61 (t, *J*<sub>HH</sub> = 7.3 Hz,  
38 1H, py<sup>4</sup>), 6.35 (d, *J*<sub>HH</sub> = 7.5 Hz, 2H, py<sup>3,5</sup>), 2.92 (m, 4H, CH), 2.26 (m, 2H, CH), 2.04 (m, 2H, CH), 1.29  
39 (m, 18H, CH<sub>3</sub>), 0.98 (m, 6H, CH<sub>3</sub>), -4.27 (t, *J*<sub>HP</sub> = 48.1 Hz, 1H, Mn-H). <sup>13</sup>C{<sup>1</sup>H} NMR (151 MHz, δ, C<sub>6</sub>D<sub>6</sub>,

1 20 °C) 235.3 (m, CO), 227.8 (m, CO), 162.9 (vt,  $J_{CP} = 6.7$  Hz,  $py^{2,6}$ ), 132.8 (s,  $py^4$ ), 118.1 (s,  $py^{3,5}$ ),  
 2 40.5 (vt,  $J_{CP} = 6.1$  Hz,  $CH_2$ ), 28.8 (vt,  $J_{CP} = 8.6$  Hz, CH), 26.4 (vt,  $J_{CP} = 10.9$  Hz, CH), 19.0 (s,  $CH_3$ ),  
 3 18.7 (s,  $CH_3$ ), 18.6 (s,  $CH_3$ ), 17.8 (s,  $CH_3$ ).  $^{31}P\{^1H\}$  NMR (101 MHz,  $\delta$ ,  $C_6D_6$ , 20 °C) 110.8 (s, 2P). IR  
 4 (ATR,  $cm^{-1}$ ): 1975 ( $\nu_{CO}$ ), 1801 ( $\nu_{CO}$ ).

5 ***cis*-[Re(PNP-*i*Pr)(CO)<sub>2</sub>Cl] (4)**. A suspension of PNP-*i*Pr (136 mg, 0.4 mmol) and  $Re(CO)_5Cl$   
 6 (144 mg, 0.4 mmol) in dioxane (15 mL) is stirred in a closed vessel at 120°C for 18 h. The suspension  
 7 is evaporated to dryness and the solid washed with  $Et_2O$  (10 ml) and *n*-pentane (20 mL). The colorless  
 8 powder is recrystallized from acetone/*n*-pentane. Yield: 191 mg (77%). Anal. Calcd. for  
 9  $C_{19}H_{33}ClN_3O_2P_2Re$  (619.09). C, 36.86; H, 5.37; N, 6.79. Found: C, 36.90; H, 5.37; N, 6.77.  $^1H$  NMR  
 10 (600 MHz,  $\delta$ ,  $dmsO-d_6$ , 20 °C) 8.41 (s, 2H, NH), 7.30 (t,  $J_{HH} = 8.0$  Hz, 1H,  $py^4$ ), 6.29 (d,  $J_{HH} = 8.0$  Hz,  
 11 2H,  $py^{3,5}$ ), 3.01 (m, 2H, CH), 2.60 (m, 2H, CH), 1.33 (dd,  $J = 12.8, 6.9$  Hz, 6H,  $CH_3$ ), 1.29 (dd,  $J =$   
 12 16.0, 8.3 Hz, 6H,  $CH_3$ ), 1.27 (dd,  $J = 17.3, 7.6$  Hz, 6H,  $CH_3$ ), 1.12 (dd,  $J = 15.0, 7.3$  Hz, 6H,  
 13  $CH_3$ ).  $^{13}C\{^1H\}$  NMR (151 MHz,  $\delta$ ,  $dmsO-d_6$ , 20 °C) 208.0 (m, CO), 195.3 (vt,  $J_{CP} = 7.8$  Hz, CO), 162.3  
 14 (vt,  $J_{CP} = 7.4$  Hz,  $py^{2,6}$ ), 139.6 (s,  $py^4$ ), 97.7 (s,  $py^{3,5}$ ), 27.3 (vt,  $J_{CP} = 15.0$  Hz, CH), 26.1 (vt,  $J_{CP} = 14.3$   
 15 Hz, CH), 20.0 (vt,  $J_{CP} = 3.8$  Hz,  $CH_3$ ), 19.8 (vt,  $J_{CP} = 4.3$  Hz,  $CH_3$ ), 18.7 (s,  $CH_3$ ), 16.81 (s,  $CH_3$ ).  
 16  $^{31}P\{^1H\}$  NMR (101 MHz,  $\delta$ ,  $dmsO-d_6$ , 20 °C) 99.7 (2P). IR (ATR,  $cm^{-1}$ ): 1918 ( $\nu_{CO}$ ), 1804 ( $\nu_{CO}$ ).

17 ***cis*-[Re(PNP-*i*Pr)(CO)<sub>2</sub>H] (Re1)**. A solution of 1M  $Na[HBET_3]$  in THF (0.3 ml, 0.3 mmol) is  
 18 added to a suspension of *cis*-[Re(PNP-*i*Pr)(CO)<sub>2</sub>Cl] (4) (186 mg, 0.3 mmol) in benzene (15 mL) at 0  
 19 °C. The colorless solution is allowed to reach room temperature, and stirred for 1 h. After filtration over  
 20 celite, the solvent is removed under reduced pressure. The crude product is washed three times with  
 21 cold *n*-pentane (30 mL). The final colorless powder is dried under reduced pressure. Yield: 162 mg  
 22 (92%). Anal. Calcd. for  $C_{19}H_{34}N_3O_2P_2Re$  (584.65). C, 39.03; H, 5.86; N, 7.19. Found: C, 39.11; H,  
 23 5.91; N, 7.15.  $^1H$  NMR (250 MHz,  $\delta$ ,  $C_6D_6$ , 20 °C) 6.69 (t,  $J_{HH} = 8.0$  Hz, 1H,  $py^4$ ), 6.29 (d,  $J_{HH} = 8.0$  Hz,  
 24 2H,  $py^{3,5}$ ), 4.45 (s, 2H, NH), 2.09 (m, 2H, CH), 1.76 (m, 2H, CH), 1.32-1.14 (m, 18H,  $CH_3$ ), 1.03 (dd,  $J$   
 25 = 15.0, 7.0 Hz, 6H,  $CH_3$ ), -3.84 (t,  $J_{HP} = 24.9$  Hz, H, ReH).  $^{13}C\{^1H\}$  NMR (151 MHz,  $\delta$ ,  $C_6D_6$ , 20 °C)  
 26 205.7 (m, CO), 198.9 (vt,  $J_{CP} = 6.5$  Hz, CO), 161.0 (vt,  $J_{CP} = 7.6$  Hz,  $py^{2,6}$ ), 136.0 (s,  $py^4$ ), 95.7 (vt,  $J_{CP}$   
 27 = 2.0 Hz,  $py^{2,6}$ ), 33.4 (vt,  $J_{CP} = 13.7$  Hz, CH), 32.2 (vt,  $J_{CP} = 14.8$  Hz, CH), 19.2 (vt,  $J_{CP} = 4.4$  Hz,  $CH_3$ ),  
 28 19.0-18.7 (m,  $CH_3$ ), 18.2 (s,  $CH_3$ ).  $^{31}P\{^1H\}$  NMR (101 MHz,  $\delta$ ,  $C_6D_6$ , 20 °C) 117.0 (2P). IR (ATR,  $cm^{-1}$ ):  
 29 1875 ( $\nu_{CO}$ ), 1805 ( $\nu_{CO}$ ).

30 ***cis*-[Re(PNP<sup>CH2</sup>-*i*Pr)(CO)<sub>2</sub>H] (Re2)**. A solution of 1M  $Na[HBET_3]$  in THF (0.3 mL, 0.3 mmol) is  
 31 added to a suspension of *cis*-[Re(PNP<sup>CH2</sup>-*i*Pr)(CO)<sub>2</sub>Cl] (5) (186 mg, 0.3 mmol) in benzene (15 mL) at 0  
 32 °C. The yellow solution is allowed to reach room temperature, and stirred for 1 h. After filtration over  
 33 Celite, the solvent is removed under reduced pressure. The crude product is washed three times with  
 34 cold *n*-pentane (30 mL). The final yellow powder is dried under reduced pressure. Yield: 165 mg (95  
 35 %). Anal. Calcd. for  $C_{21}H_{36}ReNO_2P_2$  (582.67). C, 43.29; H, 6.23; N, 2.40. Found: C, 43.38; H, 6.27; N,  
 36 2.35.  $^1H$  NMR (250 MHz,  $\delta$ ,  $C_6D_6$ , 20 °C) 6.68 (t,  $J_{HH} = 7.7$  Hz, 1H,  $py^4$ ), 6.37 (d,  $J_{HH} = 7.6$  Hz, 2H,  
 37  $py^{3,5}$ ), 3.29 (m, 2H,  $CH_2$ ), 2.99 (m, 2H,  $CH_2$ ), 2.11 (m, 2H, CH), 1.85 (m, 2H,  $CH_2$ ), 1.99 (m, 15H,  $CH_3$ ),  
 38 0.96 (m, 9H,  $CH_3$ ), -2.56 (t,  $J_{HP} = 22.8$  Hz, 1H, Re-H).  $^{13}C\{^1H\}$  NMR (151 MHz,  $\delta$ ,  $C_6D_6$ , 20 °C) 208.2  
 39 (m, CO), 204.9 (m, CO), 162.9 (vt,  $J_{CP} = 6.0$  Hz,  $py^{2,6}$ ), 133.8 (s,  $py^4$ ), 118.1 (vt,  $J_{CP} = 4.5$  Hz,  $py^{3,5}$ ),  
 40 44.3 (vt,  $J_{CP} = 10.2$  Hz,  $CH_2$ ), 29.1 (vt,  $J_{CP} = 12.1$  Hz, CH), 27.7 (vt,  $J_{CP} = 13.7$  Hz, CH), 19.6 (vt,  $J_{CP} =$

1 2.4 Hz, CH<sub>3</sub>), 19.0 (s, CH<sub>3</sub>), 18.9 (s, CH<sub>3</sub>), 18.3 (s, CH<sub>3</sub>), 18.2 (s, CH<sub>3</sub>). <sup>31</sup>P{<sup>1</sup>H} NMR (101 MHz, δ, C<sub>6</sub>D<sub>6</sub>, 20 °C) 62.1 (s, 2P). IR (ATR, cm<sup>-1</sup>): 1895 (ν<sub>CO</sub>), 1821 (ν<sub>CO</sub>).

3 **Computational Details.** The computational results presented have been achieved in part  
 4 using the Vienna Scientific Cluster (VSC). Calculations were performed using the GAUSSIAN 09  
 5 software package<sup>5</sup> and the PBE0 functional without symmetry constraints. That functional uses a  
 6 hybrid generalized gradient approximation (GGA), including 25 % mixture of Hartree-Fock<sup>6</sup> exchange  
 7 with DFT<sup>7</sup> exchange-correlation, given by Perdew, Burke and Ernzerhof functional (PBE).<sup>8</sup> The basis  
 8 set used for the geometry optimizations consisted of the Stuttgart/Dresden ECP (SDD) basis set<sup>9</sup> to  
 9 describe the electrons of Mn, and a standard 6-31G(d,p) basis set<sup>10</sup> for all other atoms. Transition  
 10 state optimizations were performed with the Synchronous Transit-Guided Quasi-Newton Method  
 11 (STQN) developed by Schlegel *et al.*,<sup>11</sup> following extensive searches of the Potential Energy Surface.  
 12 Frequency calculations were performed to confirm the nature of the stationary points, yielding one  
 13 imaginary frequency for the transition states and none for the minima. Each transition state was further  
 14 confirmed by following its vibrational mode downhill on both sides and obtaining the minima presented  
 15 on the energy profiles. The electronic energies were converted to free energy at 298.15 K and 1 atm  
 16 by using zero point energy and thermal energy corrections based on structural and vibration frequency  
 17 data calculated at the same level. Solvent effects (ethanol) were considered in all calculations using  
 18 the Polarizable Continuum Model (PCM) initially devised by Tomasi and coworkers<sup>12</sup> with radii and  
 19 non-electrostatic terms of the SMD solvation model, developed by Truhlar *et al.*<sup>13</sup> Three-dimensional  
 20 representations of the orbitals were obtained with the program Molekel.<sup>14</sup>

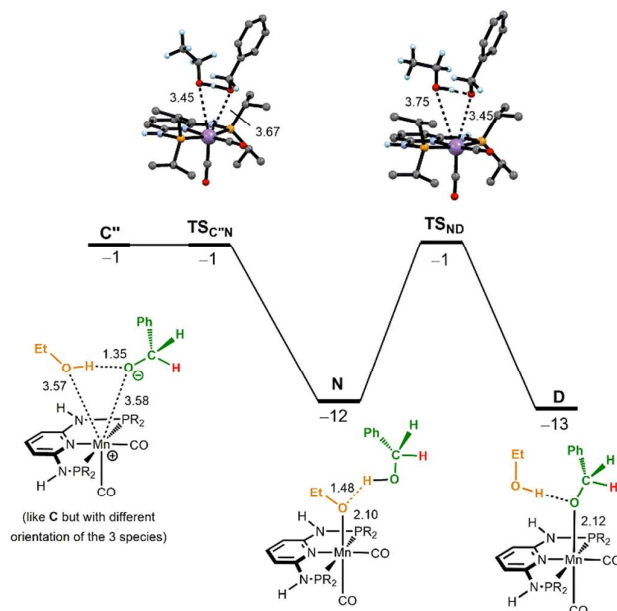

21

22 **Figure S1:** Free energy profile calculated for the formation of the O-coordinated benzaldehyde  
 23 intermediate, **D**. The free energy values (kcal/mol) are referred to the initial reactants (**A**) and relevant  
 24 distances (Å) are presented.

25

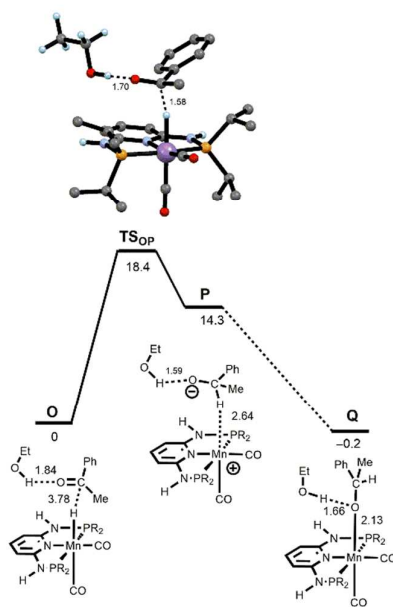

1

2 **Figure S2:** Free energy profile calculated for the hydrogenation of acetophenone catalyzed by the  
 3 hydride complex **A** + acetophenone (**O**). Relevant distances (Å) are presented.

4 **Crystal Structure Determination.** A pre-selected single crystal of **Re1**·C<sub>6</sub>H<sub>6</sub> (CCDC 1815730) was  
 5 embedded in perfluorinated polyether and mounted on a Kapton micro mount. X-ray diffraction data  
 6 were measured in a stream of nitrogen at  $T = 100$  K on a Bruker APEX-II diffractometer<sup>15</sup> with Mo-K $\alpha$   
 7 radiation. After integration of the data with the program SAINT, an absorption correction based on the  
 8 semi-empirical “multi-scan” approach was performed with the SADABS program.<sup>15</sup> The crystal  
 9 structure was solved using the dual space approach implemented in SHELXT<sup>16</sup> and was refined  
 10 against  $F^2$  using the Jana2006 software package.<sup>17</sup> The H atoms connected to C atoms were placed  
 11 geometrically and refined in the riding model approximation. Amine-H atoms were located in difference  
 12 Fourier maps and the N-H distances restrained to 0.870(1) Å. The hydride was likewise located in  
 13 difference Fourier maps and refined without constraints, using the atomic form factor for H<sup>-</sup>. All non-  
 14 hydrogen atoms were refined anisotropically. Molecular graphics were generated with the program  
 15 MERCURY.<sup>18</sup> Crystal data and experimental details are given in Table S1.

16

1 **Table S1.** Details for the crystal structure determination of **Re1**·C<sub>6</sub>H<sub>6</sub>.

|                                                         | Re1·C6H6                                                                        |
|---------------------------------------------------------|---------------------------------------------------------------------------------|
| formula                                                 | C <sub>25</sub> H <sub>40</sub> N <sub>3</sub> O <sub>2</sub> P <sub>2</sub> Re |
| fw                                                      | 662.8                                                                           |
| cryst.size, mm                                          | 0.15×0.06×0.04                                                                  |
| color, shape                                            | colourless, needle                                                              |
| crystal system                                          | Orthorhombic                                                                    |
| space group                                             | <i>P</i> 2 <sub>1</sub> 2 <sub>1</sub> 2 <sub>1</sub> (no. 19)                  |
| <i>a</i> , Å                                            | 10.1881(7)                                                                      |
| <i>b</i> , Å                                            | 13.7426(11)                                                                     |
| <i>c</i> , Å                                            | 20.6392(16)                                                                     |
| <i>V</i> , Å <sup>3</sup>                               | 2889.7(4)                                                                       |
| <i>T</i> , K                                            | 100                                                                             |
| <i>Z</i> , <i>Z'</i>                                    | 4, 1                                                                            |
| $\rho_{\text{calc}}$ , g cm <sup>-3</sup>               | 1.5234                                                                          |
| $\mu$ , mm <sup>-1</sup> (MoK $\alpha$ )                | 4.340                                                                           |
| <i>F</i> (000)                                          | 1328                                                                            |
| absorption corrections, $T_{\text{min}}-T_{\text{max}}$ | multi-scan, 0.52–0.84                                                           |
| $\theta$ range, deg                                     | 2.23–27.30                                                                      |
| no. of rflns measd                                      | 11 512                                                                          |
| <i>R</i> <sub>int</sub>                                 | 0.0558                                                                          |
| no. of rflns unique                                     | 6403                                                                            |
| no. of rflns $I > 2\sigma(I)$                           | 4528                                                                            |
| no. of params / restraints                              | 309 / 2                                                                         |
| <i>R</i> ( $I > 2\sigma(I)$ ) <sup>a</sup>              | 0.0484                                                                          |
| <i>R</i> (all data)                                     | 0.0764                                                                          |
| <i>wR</i> ( $I > 2\sigma(I)$ )                          | 0.0991                                                                          |
| <i>wR</i> (all data)                                    | 0.1115                                                                          |
| Goof                                                    | 1.11                                                                            |
| Diff.Four.peaks                                         | -1.10 / 2.27                                                                    |
| CCDC no.                                                | 1815730                                                                         |

2 <sup>a</sup>  $R = \sum ||F_o| - |F_c|| / \sum |F_o|$ ,  $wR = \{\sum w(F_o^2 - F_c^2) / \sum [w(F_o^2)^2]\}^{1/2}$ ,  $\text{Goof} = \{\sum [w(F_o^2 - F_c^2)^2] / (n-p)\}^{1/2}$

3

4

5

6

7

1 **Figure S3:**  $^1\text{H}$  NMR spectrum of *cis*-[Re(PNP<sup>NH</sup>-*i*Pr)(CO)<sub>2</sub>Cl] (**4**) (600 MHz, dmsd-d<sub>6</sub>)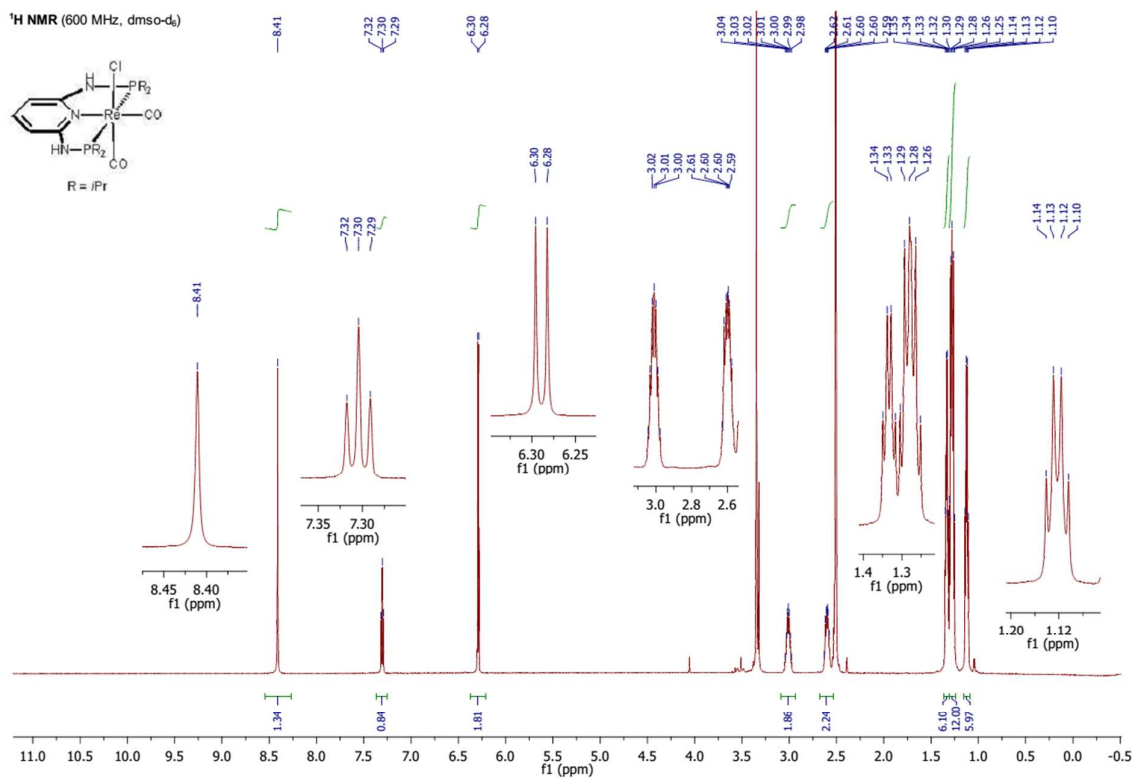

2

3 **Figure S4:**  $^{13}\text{C}\{^1\text{H}\}$  NMR spectrum of *cis*-[Re(PNP<sup>NH</sup>-*i*Pr)(CO)<sub>2</sub>Cl] (**4**) (151 MHz, dmsd-d<sub>6</sub>)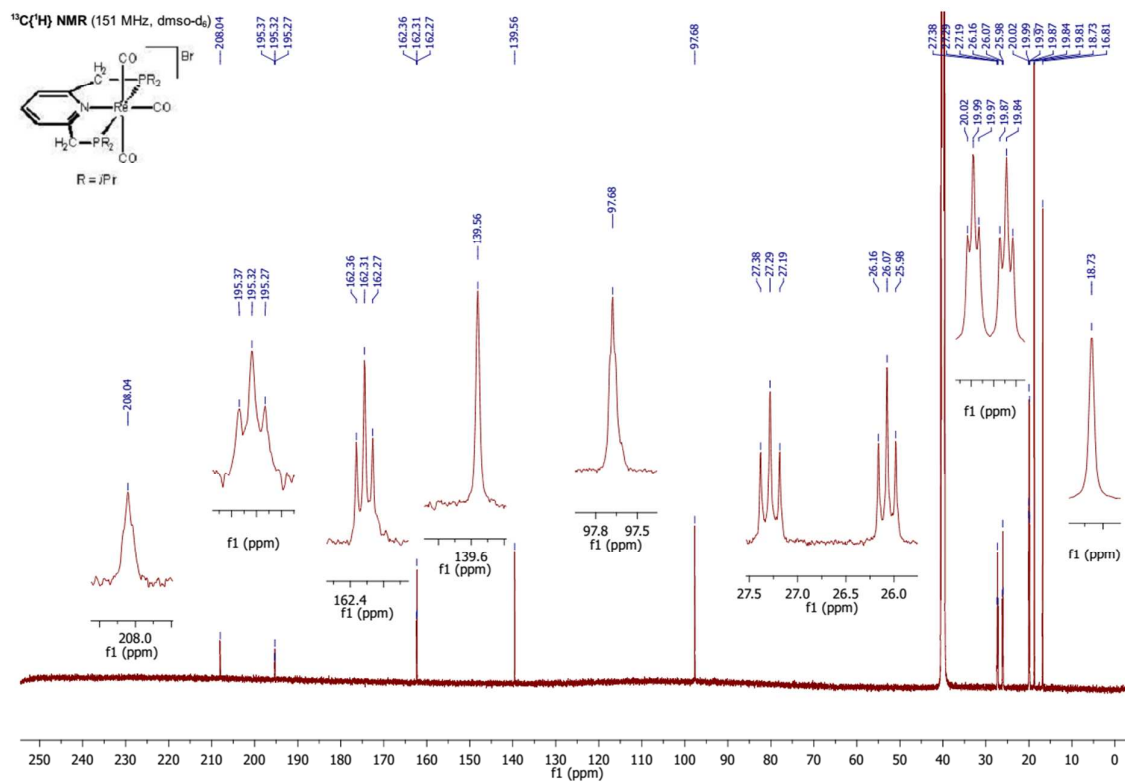

4

1 **Figure S5:**  $^{31}\text{P}\{^1\text{H}\}$  NMR spectrum of *cis*-[Re(PNP<sup>NH</sup>-*i*Pr)(CO)<sub>2</sub>Cl] (**4**) (101 MHz, dms<sub>o</sub>-d<sub>6</sub>)

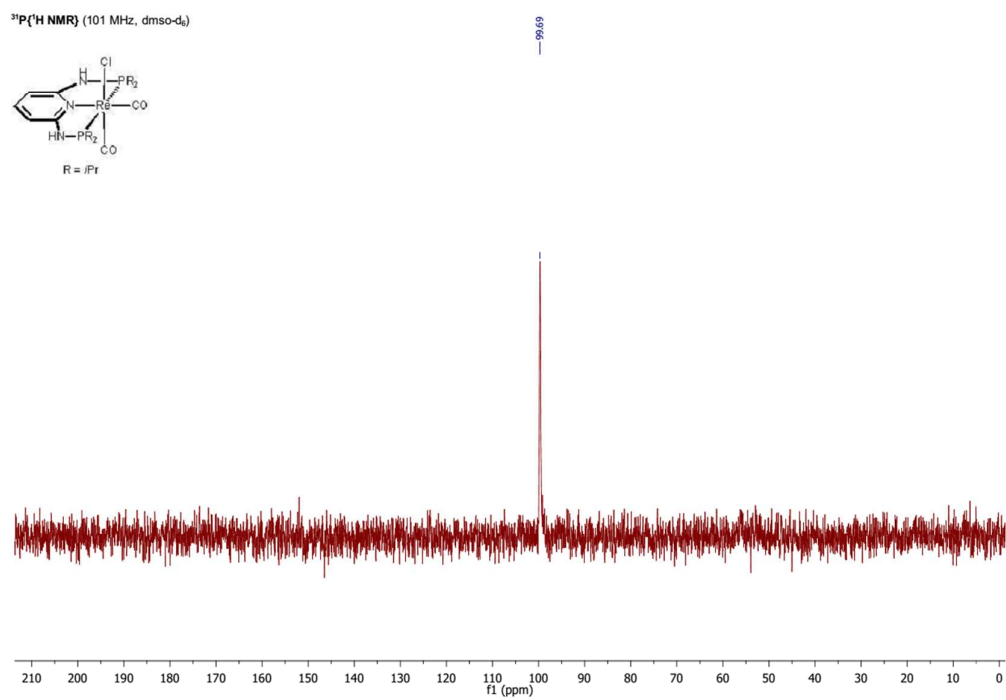

2

3 **Figure S6:** IR spectrum of *cis*-[Re(PNP<sup>NH</sup>-*i*Pr)(CO)<sub>2</sub>Cl] (**4**)

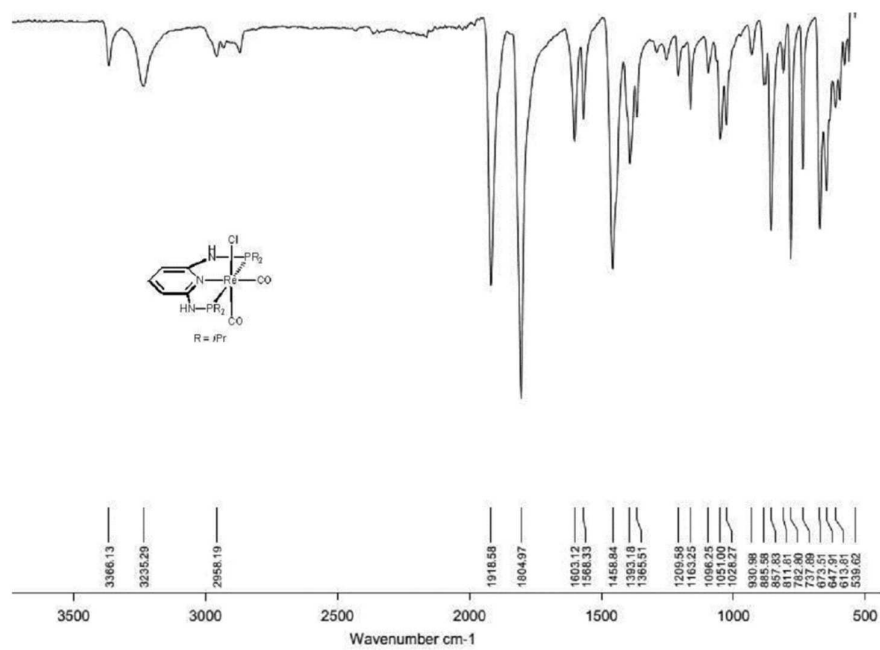

4

5

6

7



1 **Figure S7:**  $^1\text{H}$  NMR spectrum of *cis*-[Mn(PNP<sup>CH<sub>2</sub></sup>-*i*Pr)(CO)<sub>2</sub>H] (**Mn3**) (250 MHz, C<sub>6</sub>D<sub>6</sub>)

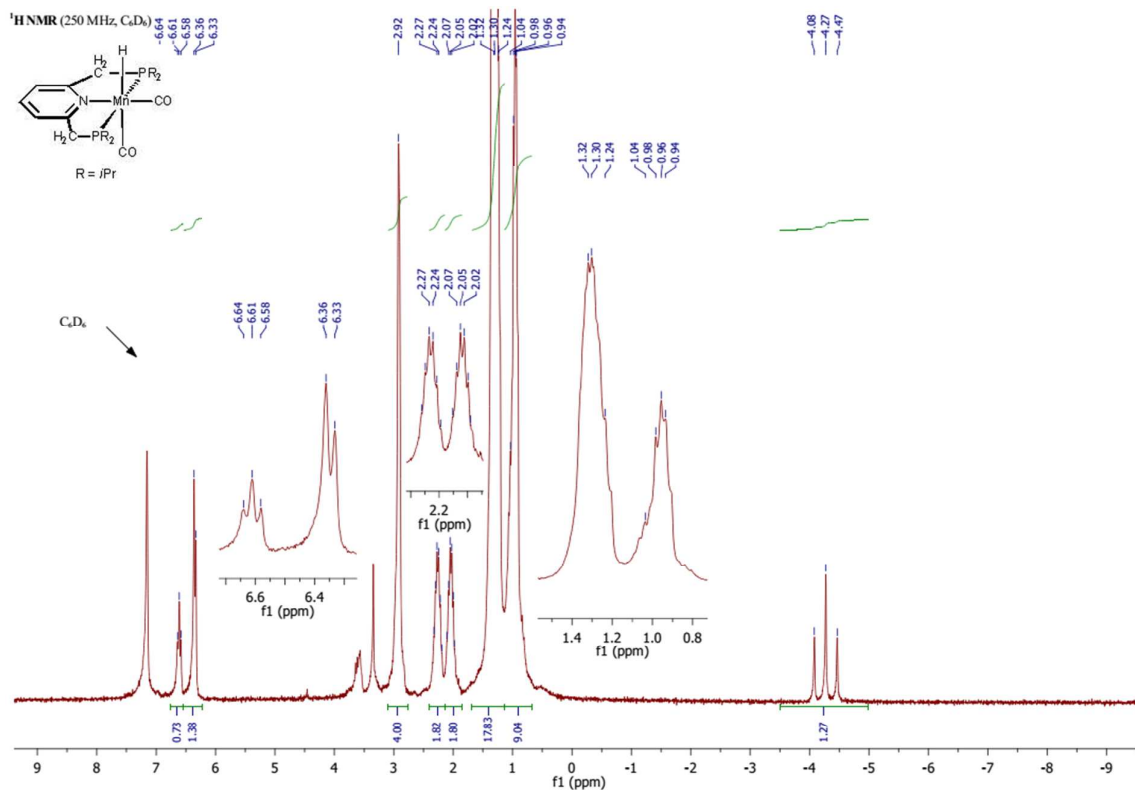

2

3 **Figure S8:**  $^{13}\text{C}\{^1\text{H}\}$  NMR spectrum of *cis*-[Mn(PNP<sup>CH<sub>2</sub></sup>-*i*Pr)(CO)<sub>2</sub>H] (**Mn3**) (151 MHz, C<sub>6</sub>D<sub>6</sub>)

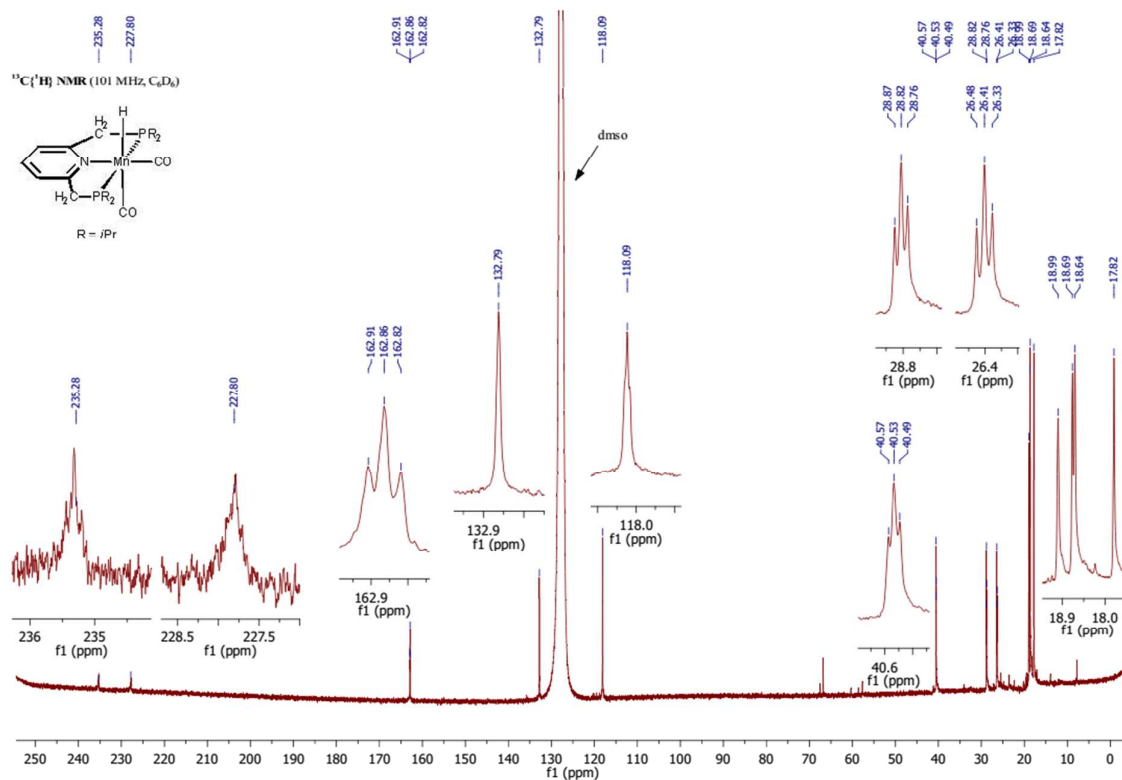

4

1 **Figure S9:**  $^{31}\text{P}\{^1\text{H}\}$  NMR spectrum of *cis*-[Mn(PNP<sup>CH2</sup>-iPr)(CO)<sub>2</sub>H] (**Mn3**) (101 MHz, C<sub>6</sub>D<sub>6</sub>)

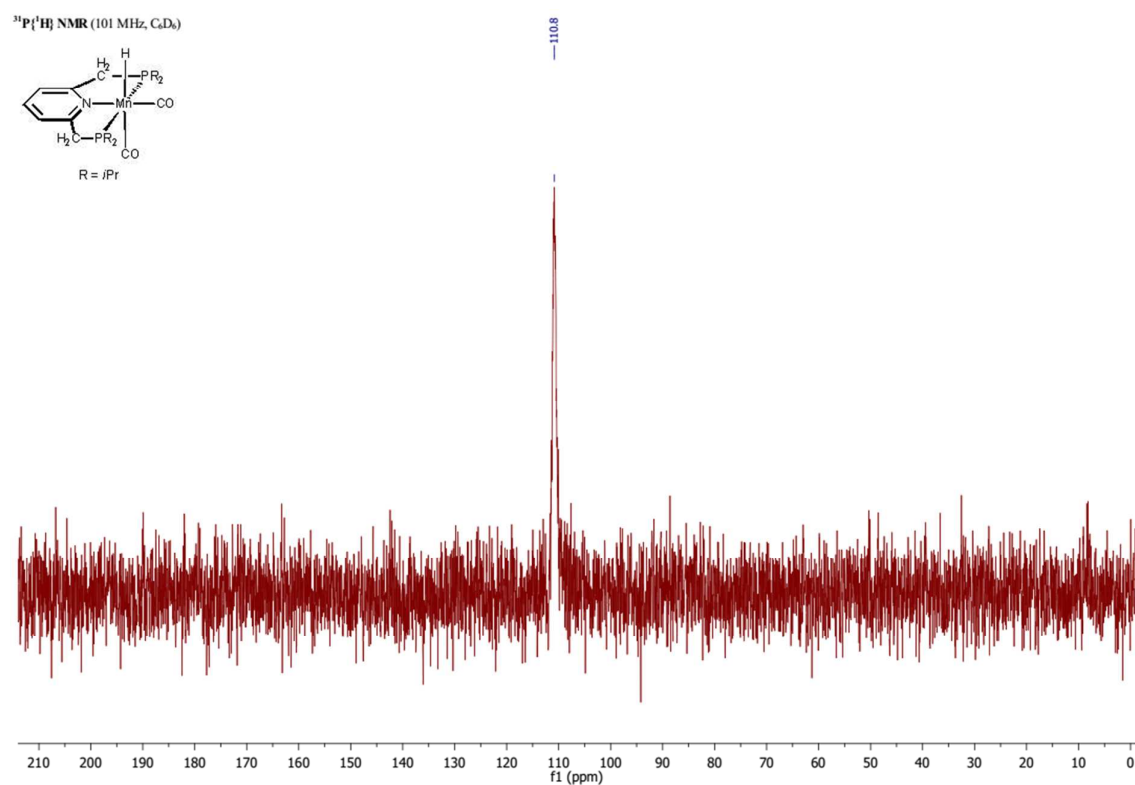

2

3 **Figure S10:** IR spectrum of *cis*-[Mn(PNP<sup>CH2</sup>-iPr)(CO)<sub>2</sub>H] (**Mn3**)

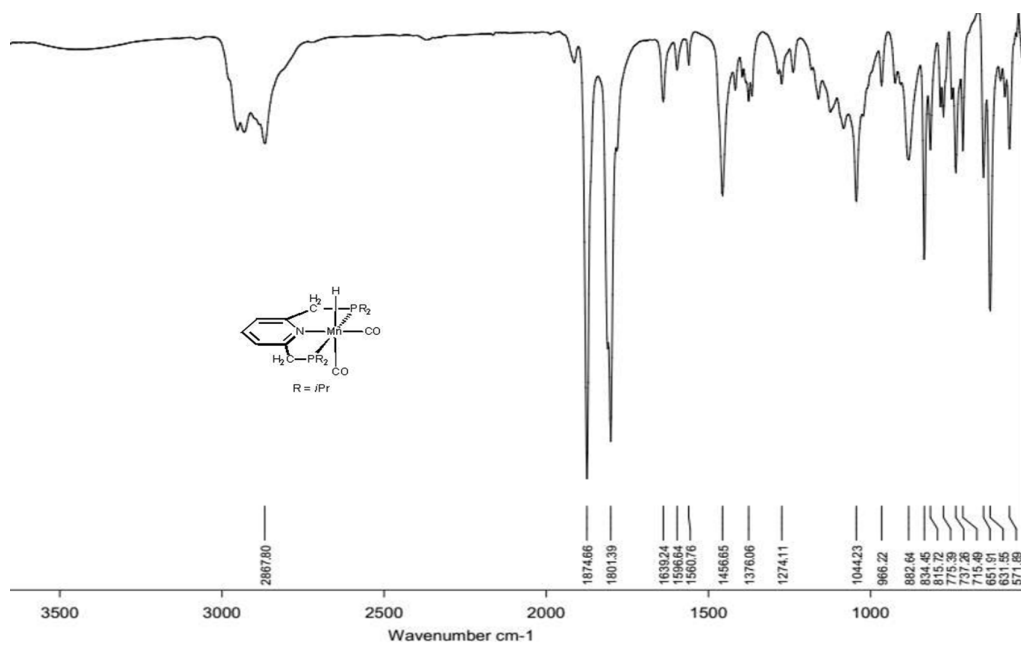

4

1 **Figure S11:**  $^1\text{H}$  NMR spectrum of *cis*-[Re(PNP<sup>NH</sup>-iPr)(CO)<sub>2</sub>H] (**Re1**) (250 MHz, C<sub>6</sub>D<sub>6</sub>)

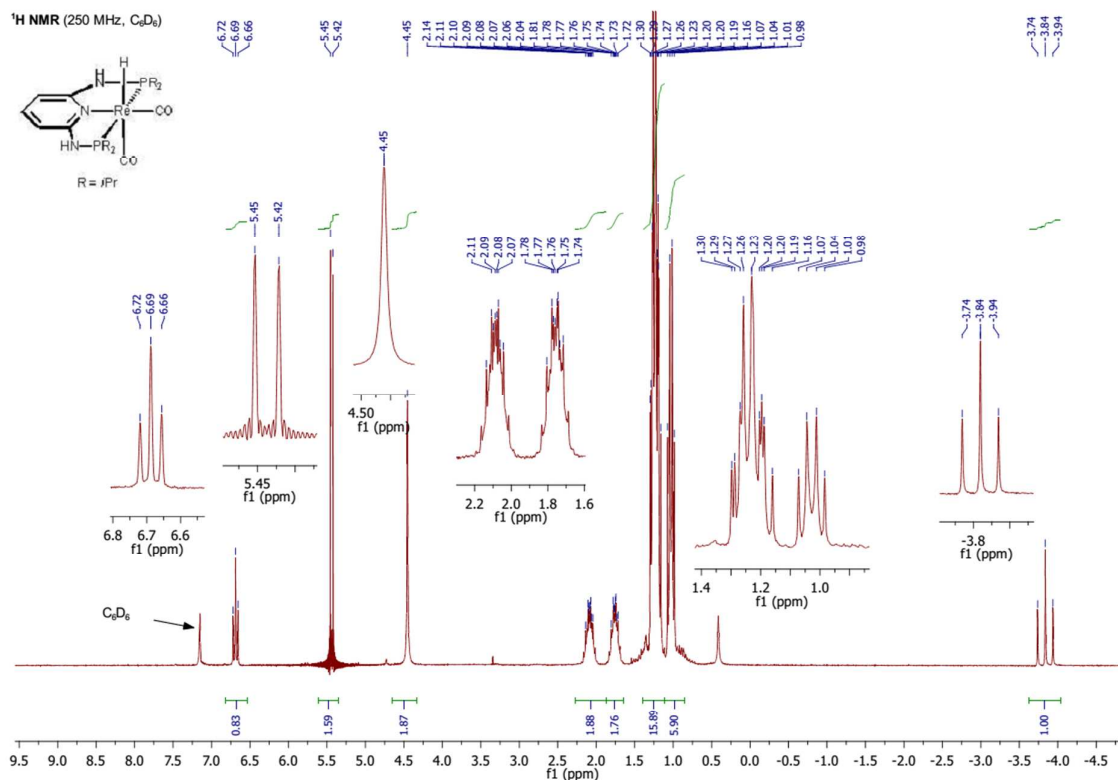

2

3 **Figure S12:**  $^{13}\text{C}\{^1\text{H}\}$  NMR spectrum of *cis*-[Re(PNP<sup>NH</sup>-iPr)(CO)<sub>2</sub>H] (**Re1**) (151 MHz, C<sub>6</sub>D<sub>6</sub>)

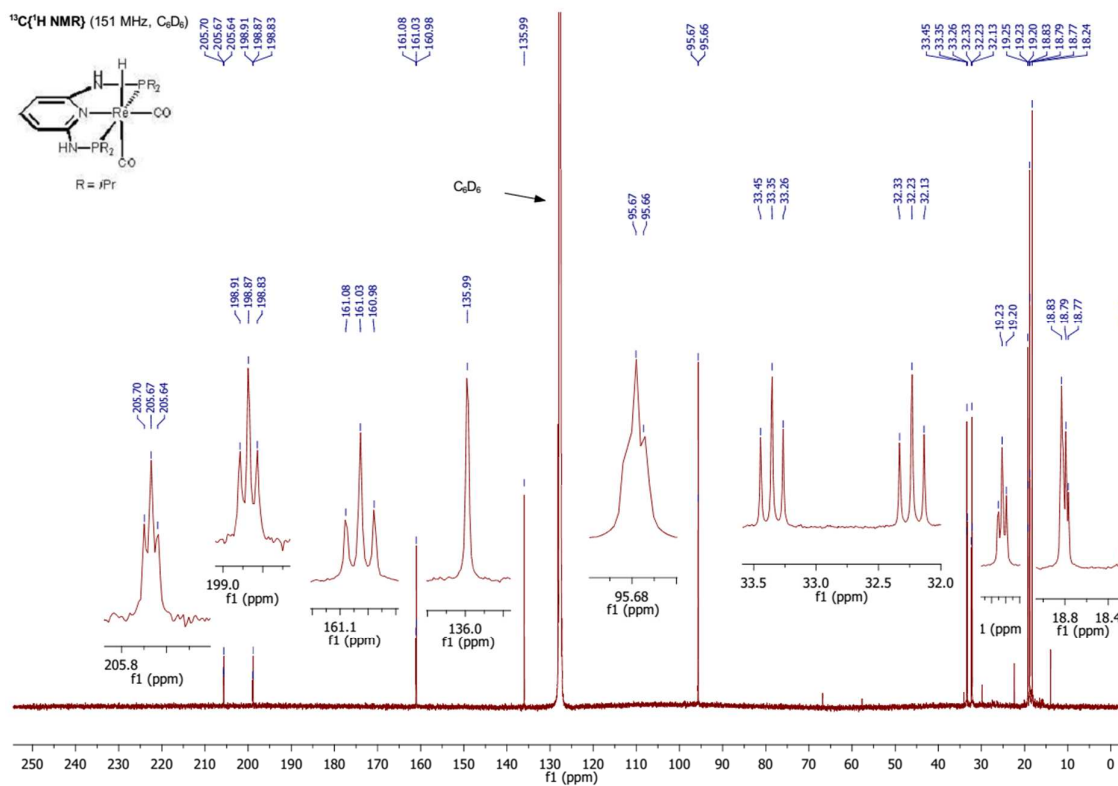

4

1 **Figure S13:**  $^{31}\text{P}\{^1\text{H}\}$  NMR spectrum of *cis*-[Re(PNP<sup>NH</sup>-*i*Pr)(CO)<sub>2</sub>H] (**Re1**) (101 MHz, C<sub>6</sub>D<sub>6</sub>)

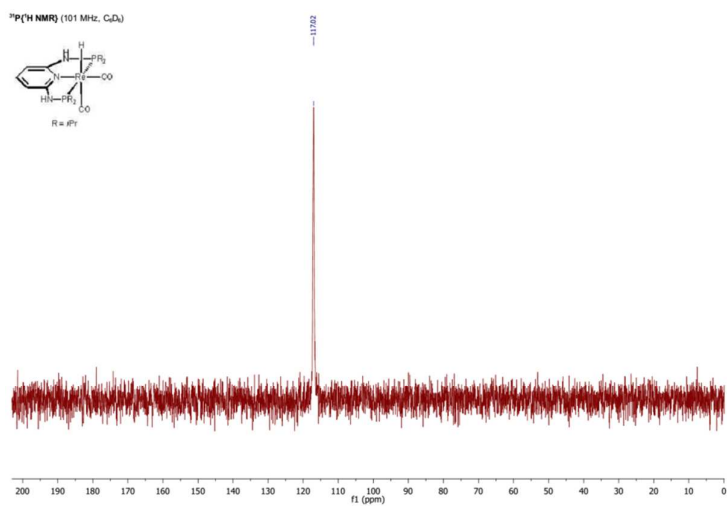

2

3 **Figure S14:** IR spectrum of *cis*-[Re(PNP<sup>NH</sup>-*i*Pr)(CO)<sub>2</sub>H] (**Re1**)

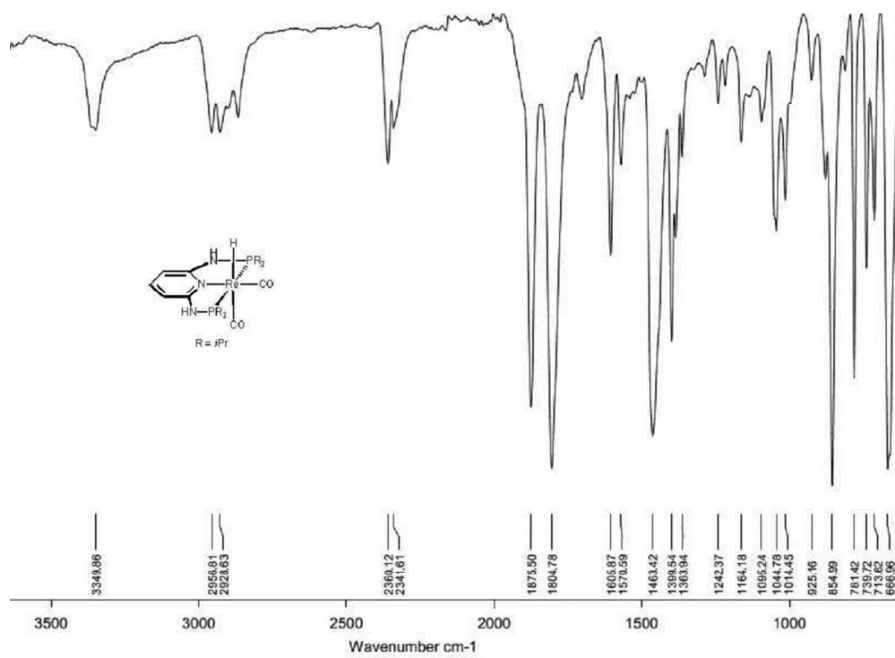

4

5

1 **Figure S15:**  $^1\text{H}$  NMR spectrum of *cis*-[Re(PNP<sup>CH<sub>2</sub></sup>-iPr)(CO)<sub>2</sub>H] (**Re2**) (250 MHz, C<sub>6</sub>D<sub>6</sub>)

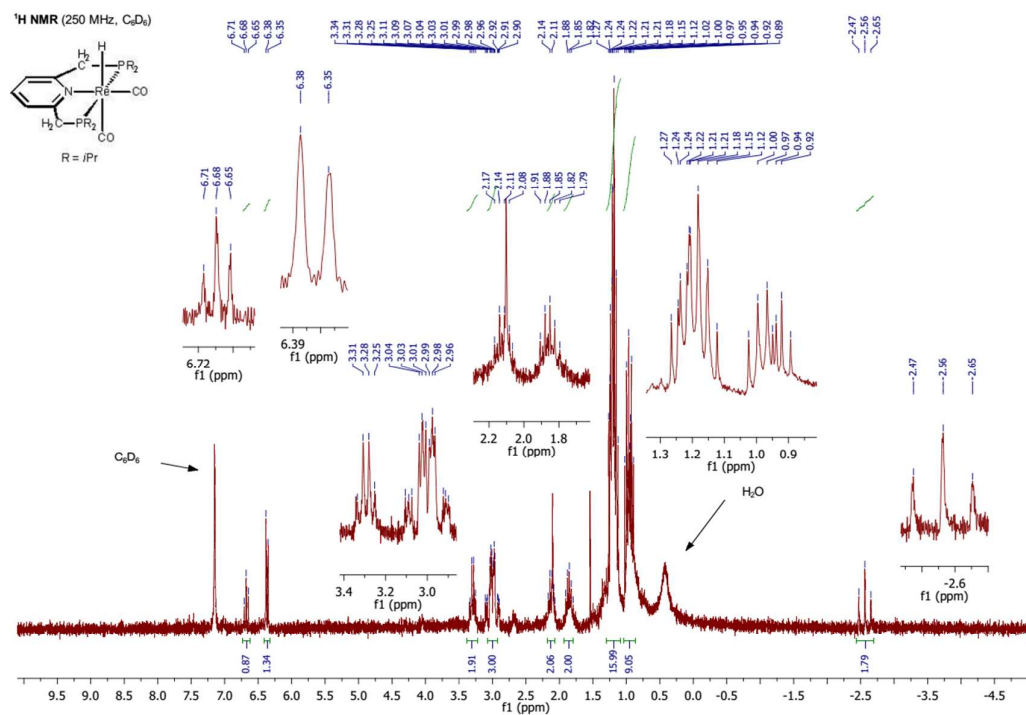

2

3 **Figure S16:**  $^{13}\text{C}\{^1\text{H}\}$  NMR spectrum of *cis*-[Re(PNP<sup>CH<sub>2</sub></sup>-iPr)(CO)<sub>2</sub>H] (**Re2**) (151 MHz, CD<sub>2</sub>Cl<sub>2</sub>)

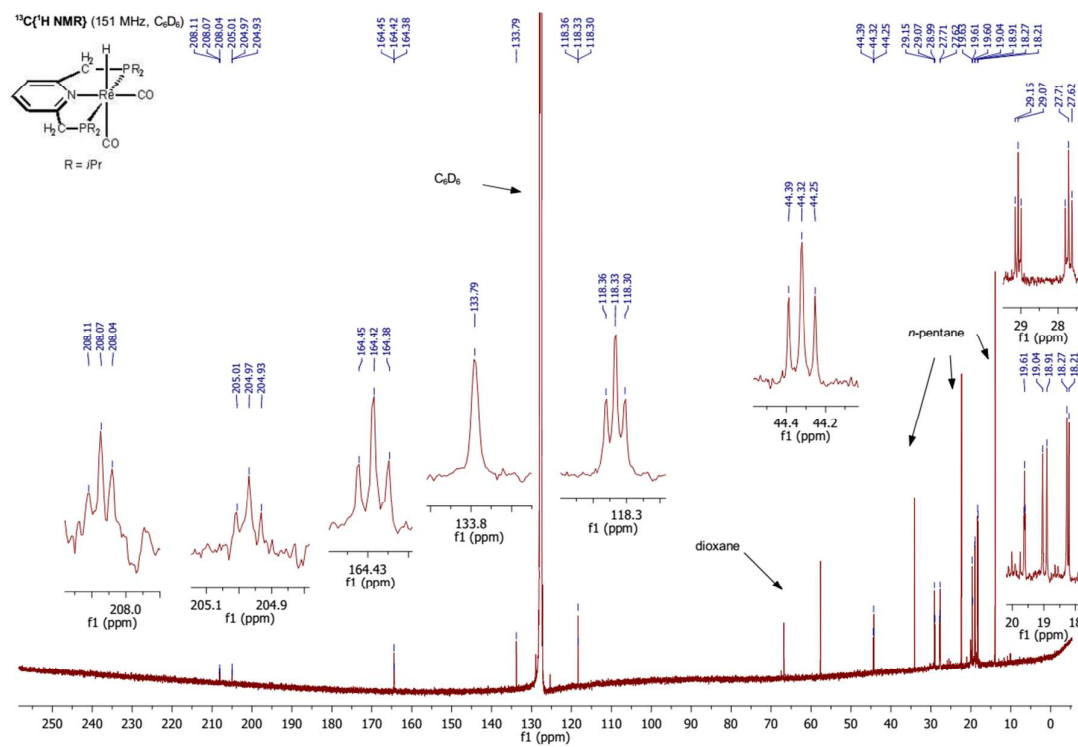

4

5

1 **Figure S17:**  $^1\text{H}$  NMR spectrum of *cis*-[Re(PNP<sup>CH2</sup>-iPr)(CO)<sub>2</sub>H] (**Re2**) (101 MHz, CD<sub>2</sub>Cl<sub>2</sub>)

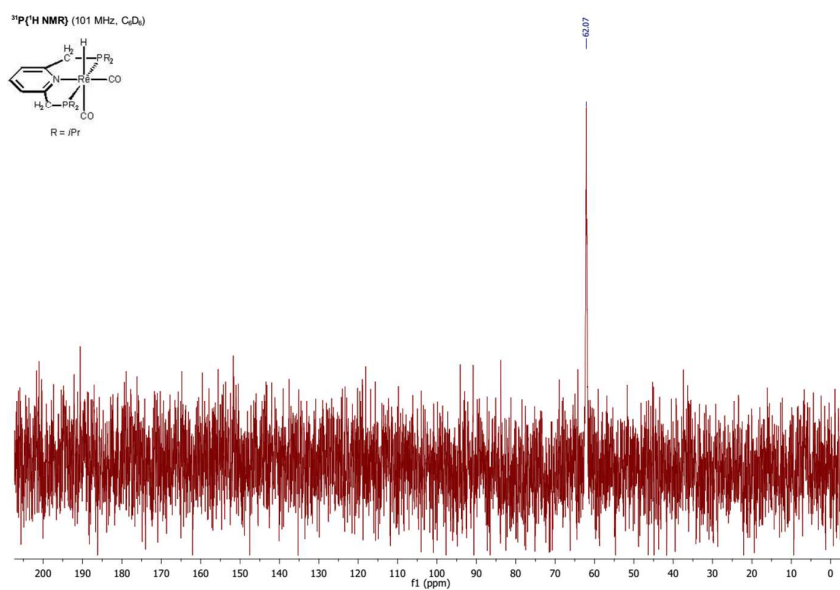

2

3 **Figure S18:** IR spectrum of *cis*-[Re(PNP<sup>CH2</sup>-iPr)(CO)<sub>2</sub>H] (**Re2**)

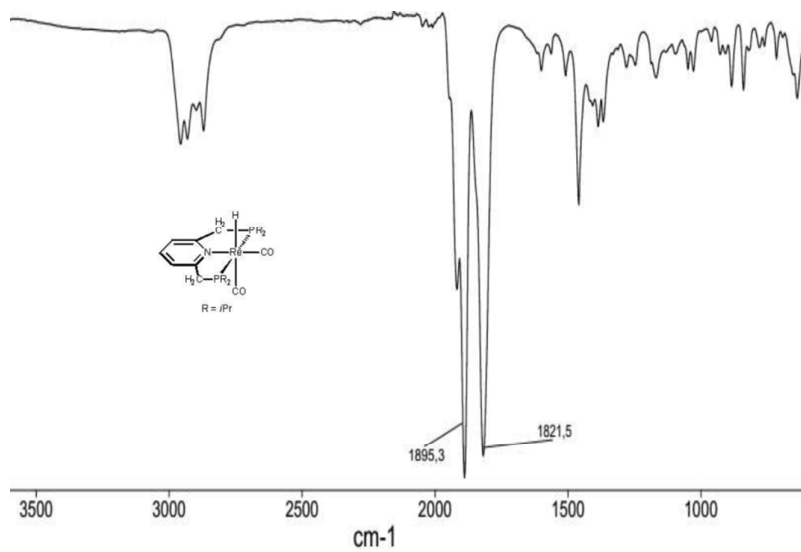

4

5

## 1 References

---

- 1 Perrin, D. D.; Armarego, W. L. F. *Purification of Laboratory Chemicals*, 3rd ed.; Pergamon: New York, **1988**.
- 2 Mastalir, M.; Glatz, M.; Gorgas, N.; Stöger, B.; Pittenauer, E.; Allmaier, G.; Veiros, L. F.; Kirchner, K. *Chem. Eur. J.* **2016**, *22*, 12316-12320.
- 3 Neumann, J.; Elangovan, S.; Spannberg, A.; Junge K.; Beller, M. *Chem. Eur. J.* **2017**, 5410-5413.
- 4 Glatz, M.; Stöger, B.; Kirchner, K. *Acta Cryst.* **2017**, B73, 941-949.
- 5 Gaussian 09, Revision A.02, Frisch, M. J.; Trucks, G. W.; Schlegel, H. B.; Scuseria, G. E.; Robb, M. A.; Cheeseman, J. R.; Scalmani, G.; Barone, V.; Mennucci, B.; Petersson, G. A.; Nakatsuji, H.; Caricato, M.; Li, X.; Hratchian, H. P.; Izmaylov, A. F.; Bloino, J.; Zheng, G.; Sonnenberg, J. L.; Hada, M.; Ehara, M.; Toyota, K.; Fukuda, R.; Hasegawa, J.; Ishida, M.; Nakajima, T.; Honda, Y.; Kitao, O.; Nakai, H.; Vreven, T.; Montgomery, Jr., J. A.; Peralta, J. E.; Ogliaro, F.; Bearpark, M.; Heyd, J. J.; Brothers, E.; Kudin, K. N.; Staroverov, V. N.; Kobayashi, R.; Normand, J.; Raghavachari, K.; Rendell, A.; Burant, J. C.; Iyengar, S. S.; Tomasi, J.; Cossi, M.; Rega, N.; Millam, J. M.; Klene, M.; Knox, J. E.; Cross, J. B.; Bakken, V.; Adamo, C.; Jaramillo, J.; Gomperts, R.; Stratmann, R. E.; Yazyev, O.; Austin, A. J.; Cammi, R.; Pomelli, C.; Ochterski, J. W.; Martin, R. L.; Morokuma, K.; Zakrzewski, V. G.; Voth, G. A.; Salvador, P.; Dannenberg, J. J.; Dapprich, S.; Daniels, A. D.; Farkas, Ö.; Foresman, J. B.; Ortiz, J. V.; Cioslowski, J.; Fox, D. J. Gaussian, Inc., Wallingford CT, **2009**.
- 6 Hehre, W. J.; Radom, L.; Schleyer, P. v. R.; Pople, J. A.; *Ab Initio Molecular Orbital Theory*, Wiley, New York, 1986.
- 7 Parr, R. G.; Yang, W.; *Density Functional Theory of Atoms and Molecules*, Oxford University Press, New York, 1989.
- 8 (a) Perdew, J. P.; Burke, K.; Ernzerhof, M. *Phys. Rev. Lett.* **1997**, *78*, 1396. (b) Perdew, J. P. *Phys. Rev. B* **1986**, *33*, 8822.
- 9 (a) Haeusermann, U.; Dolg, M.; Stoll, H.; Preuss, H. *Mol. Phys.* **1993**, *78*, 1211-1224. (b) Kuechle, W.; Dolg, M.; Stoll, H.; Preuss, H. *J. Chem. Phys.* **1994**, *100*, 7535-7542. (c) Leininger, T.; Nicklass, A.; Stoll, H.; Dolg, M.; Schwerdtfeger, P. *J. Chem. Phys.* **1996**, *105*, 1052-1059.
- 10 (a) McLean, A. D.; Chandler, G. S. *J. Chem. Phys.* **1980**, *72*, 5639-5648. (b) Krishnan, R.; Binkley, J. S.; Seeger, R.; Pople, J. A. *J. Chem. Phys.* **1980**, *72*, 650-654. (c) Wachters, A. J. H. *J. Chem. Phys.* **1970**, *52*, 1033-1036. (d) Hay, P. J. *J. Chem. Phys.* **1977**, *66*, 4377-4384. (e) Raghavachari, K.; Trucks, G. W. *J. Chem. Phys.* **1989**, *91*, 1062-1065. (f) Binning Jr., R. C.; Curtiss, L. A. *J. Comp. Chem.*, **1990**, *11*, 1206. (g) McGrath, M. P.; Radom, L. *J. Chem. Phys.* **1991**, *94*, 511-516.
- 11 (a) Peng, C.; Ayala, P.Y.; Schlegel, H.B.; Frisch, M.J. *J. Comp. Chem.* **1996**, *17*, 49-56. (b) Peng, C.; Schlegel, H.B. *Israel J. Chem.* **1993**, *33*, 449-454.

- 
- 12 (a) Cancès, M. T.; Mennucci, B.; Tomasi, J. *J. Chem. Phys.* **1997**, *107*, 3032-3041. (b) Cossi, M.; Barone, V.; Mennucci, B.; Tomasi, J. *Chem. Phys. Lett.* **1998**, *286*, 253-260. (c) Mennucci B.; Tomasi, J. *J. Chem. Phys.* **1997**, *106*, 5151-5158. (d) Tomasi, J.; Mennucci, B.; Cammi, R. *Chem. Rev.* **2005**, *105*, 2999-3094.
- 13 Marenich, A. V.; Cramer, C. J.; Truhlar, D. G. *J. Phys. Chem. B*, **2009**, *113*, 6378-6396.
- 14 Portmann, S.; Lüthi, H. P. *Chimia*, **2000**, *54*, 766-770.
- 15 *APEX2* (v. 2017-1), *SAINT* (v. 8.34A), *SADABS* (v. 2017-1). Bruker AXS Inc., Madison, Wisconsin, USA.
- 16 Sheldrick, G. M. *Acta Crystallogr.* **2015**, *A71*, 3–8.
- 17 Petříček, V.; Dušek, M.; Palatinus, L. *Z. Kristallogr.* **2014**, *229*, 345–352.
- 18 Macrae, C. F.; Edgington, P. R.; McCabe, P.; Pidcock, E.; Shields, G. P.; Taylor, R.; Towler, M.; and van de Streek, J. *J. Appl. Cryst.* **2006**, *39*, 453–457.
